# Supplementary material for: How can net petroleum importers achieve risk aversion in in a globalized world: A multi-regional input-output perspective
Source: Research Square preprint supplement (doi:10.21203/rs.3.rs-1331222/v1), 2022-03-10
Supplement: Supplementary file 1 [file e7b1dbb0bbefcfa30c8e29ee.docx]

**Appendix A**

See appendix Table A1

**Table A1**

The fundamental structure of Multi-Regional Input-Output table.

| From/to | | Intermediate use | | | | | | | Final use | | | Total output |
| --- | --- | --- | --- | --- | --- | --- | --- | --- | --- | --- | --- | --- |
| Region 1 | | | … | Region m | |  | Region 1 | … | Region m |
| Sector 1 | … | Sector n | … | Sector 1 | … | Sector n |  |  |  |
| Region 1 | Sector 1 | Z | | | | | | | Y | | | X |
| Sector 2 |
| … |
| Sector n |
| … | … |
| Region m | Sector 1 |
| Sector 2 |
| … |
| Sector n |
| Total intermediate consumption | |  | | | | | | | | | | |
| Value Added | |  | | | | | | | | | | |
| Total input | |  | | | | | | | | | | |

**Appendix B**

See appendix Table B1

**Table B1**

Regions included in WIOD.

|  | Abbr. | Region | Economy grouping | Region grouping |
| --- | --- | --- | --- | --- |
| 1 | AUS | Australia | AUS | Asia pacific |
| 2 | AUT | Austria | AUT | Europe & Eurasia |
| 3 | BEL | Belgium | EU21 | Europe & Eurasia |
| 4 | BGR | Bulgaria | EU21 | Europe & Eurasia |
| 5 | BRA | Brazil | BRA | South America |
| 6 | CAN | Canada | CAN | North America |
| 7 | CHN | China | CHN | Asia pacific |
| 8 | CYP | Cyprus | EU21 | Europe & Eurasia |
| 9 | CZE | Czech Republic | EU21 | Europe & Eurasia |
| 10 | DEU | Germany | DEU | Europe & Eurasia |
| 11 | DNK | Denmark | EU21 | Europe & Eurasia |
| 12 | ESP | Spain | ESP | Europe & Eurasia |
| 13 | EST | Estonia | EU21 | Europe & Eurasia |
| 14 | FIN | Finland | EU21 | Europe & Eurasia |
| 15 | FRA | France | FRA | Europe & Eurasia |
| 16 | GBR | United Kingdom | GBR | Europe & Eurasia |
| 17 | GRC | Greece | EU21 | Europe & Eurasia |
| 18 | HUN | Hungary | EU21 | Europe & Eurasia |
| 19 | IDN | Indonesia | IDN | Asia pacific |
| 20 | IND | India | IND | Europe & Eurasia |
| 21 | IRL | Ireland | EU21 | Europe & Eurasia |
| 22 | ITA | Italy | ITA | Europe & Eurasia |
| 23 | JPN | Japan | JPN | Asia pacific |
| 24 | KOR | South Korea | KOR | Asia pacific |
| 25 | LTU | Lithuania | EU21 | Europe & Eurasia |
| 26 | LUX | Luxembourg | EU21 | Europe & Eurasia |
| 27 | LVA | Latvia | EU21 | Europe & Eurasia |
| 28 | MEX | Mexio | MEX | North America |
| 29 | MLT | Malta | EU21 | Europe & Eurasia |
| 30 | NLD | Netherlands | EU21 | Europe & Eurasia |
| 31 | POL | Poland | EU21 | Europe & Eurasia |
| 32 | PRT | Portugal | EU21 | Europe & Eurasia |
| 33 | ROU | Romania | EU21 | Europe & Eurasia |
| 34 | RUS | Russian | RUS | Europe & Eurasia |
| 35 | SVK | Slovakia | EU21 | Europe & Eurasia |
| 36 | SVN | Slovenia | EU21 | Europe & Eurasia |
| 37 | SWE | Sweden | EU21 | Europe & Eurasia |
| 38 | TUR | Turkey | TUR | Europe & Eurasia |
| 39 | TWN | Taiwan | CHN | Asia pacific |
| 40 | USA | United States | USA | North America |
| 41 | ROW | Rest of World | ROW | Rest of World |

**Appendix C**

See appendix Table C1

**Table C1**

Sectors included in WIOD.

|  | Sector content | Sector grouping |
| --- | --- | --- |
| 1 | Agriculture, Hunting, Forestry and Fishing | Agriculture |
| 2 | Mining and Quarrying | Mining |
| 3 | Food, Beverages and Tobacco | Light manufacturing |
| 4 | Textiles and Textile Products | Light manufacturing |
| 5 | Leather, Leather and Footwear | Light manufacturing |
| 6 | Wood and Products of Wood and Cork | Light manufacturing |
| 7 | Pulp, Paper, Paper , Printing and Publishing | Light manufacturing |
| 8 | Coke, Refined Petroleum and Nuclear Fuel | Heavy manufacturing |
| 9 | Chemicals and Chemical Products | Heavy manufacturing |
| 10 | Rubber and Plastics | Heavy manufacturing |
| 11 | Other Non-Metallic Mineral | Heavy manufacturing |
| 12 | Basic Metals and Fabricated Metal | Heavy manufacturing |
| 13 | Machinery, Nec | Heavy manufacturing |
| 14 | Electrical and Optical Equipment | Heavy manufacturing |
| 15 | Transport Equipment | Heavy manufacturing |
| 16 | Manufacturing, Nec; Recycling | Light manufacturing |
| 17 | Electricity, Gas and Water Supply | Electricity |
| 18 | Construction | Service |
| 19 | Sale, Maintenance and Repair of Motor Vehicles and Motorcycles; Retail Sale of Fuel | Service |
| 20 | Wholesale Trade and Commission Trade, Except of Motor Vehicles and Motorcycles | Service |
| 21 | Retail Trade, Except of Motor Vehicles and Motorcycles; Repair of Household Goods | Service |
| 22 | Hotels and Restaurants | Service |
| 23 | Inland Transport | Transport |
| 24 | Water Transport | Transport |
| 25 | Air Transport | Transport |
| 26 | Other Supporting and Auxiliary Transport Activities; Activities of Travel Agencies | Transport |
| 27 | Post and Telecommunications | Service |
| 28 | Financial Intermediation | Service |
| 29 | Real Estate Activities | Service |
| 30 | Renting of M&Eq and Other Business Activities | Service |
| 31 | Public Admin and Defence; Compulsory Social Security | Service |
| 32 | Education | Service |
| 33 | Health and Social Work | Service |
| 34 | Other Community, Social and Personal Services | Service |
| 35 | Private Households with Employed Persons | Service |
